# Supplementary material for: Tailoring the hydrogen storage properties of Li4BN3H10 by confinement into highly ordered nanoporous carbon
Source: Royal Society of Chemistry journal article supplement (doi:10.1039/c3ta00174a), 2013-01-01
Supplement: c3ta00174a.pdf [file c3ta00174a.pdf]

# **Supporting Information for**

## **Tailoring the hydrogen storage properties of $\text{Li}_4\text{BN}_3\text{H}_{10}$ by confinement into highly ordered nanoporous carbon**

**Xiangfeng Liu,<sup>1,2</sup> David Peaslee,<sup>2</sup> and Eric H. Majzoub\*<sup>2</sup>**

*<sup>1</sup>Center for Nanoscience, and Department of Physics and Astronomy, University  
of Missouri-St. Louis, One University Blvd., St. Louis, MO 63121, USA*

*<sup>2</sup>College of Materials Science and Opto-Electronic Technology, University of Chinese Academy  
of Sciences, Beijing, 10049, P. R. China*

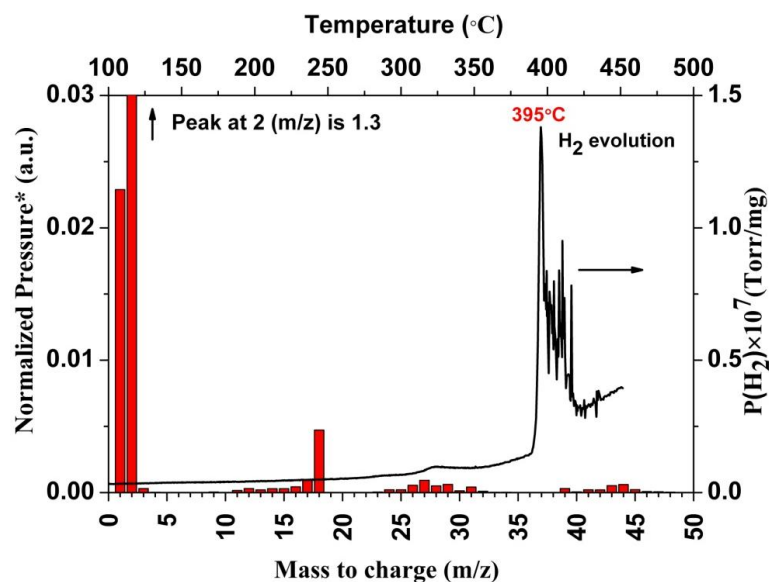

(a)

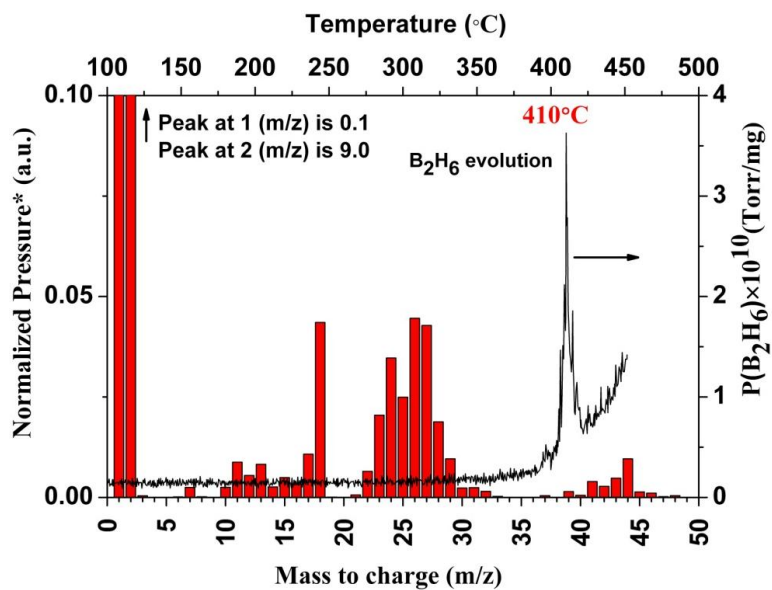

(b)

**Fig. S1.** Direct line-of-sight RGA cracking patterns and gas evolution of  $\text{LiBH}_4$ . (a) shows the evolution of  $\text{H}_2$  ( $m/z=2$ ) as well as the cracking pattern taken at  $395^\circ\text{C}$ ; (b) shows the evolution of  $\text{B}_2\text{H}_6$  ( $m/z=24$ ) as well as the cracking pattern taken at  $410^\circ\text{C}$ .

\*All mass spectra bar graphs have been background subtracted. All arbitrary units (a.u.) are with respect to the partial pressure of the corresponding gas evolution.

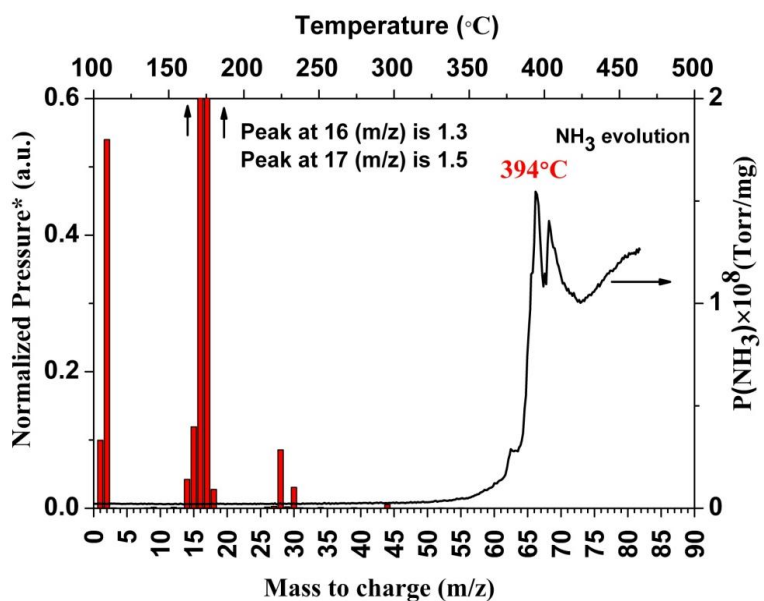

(a)

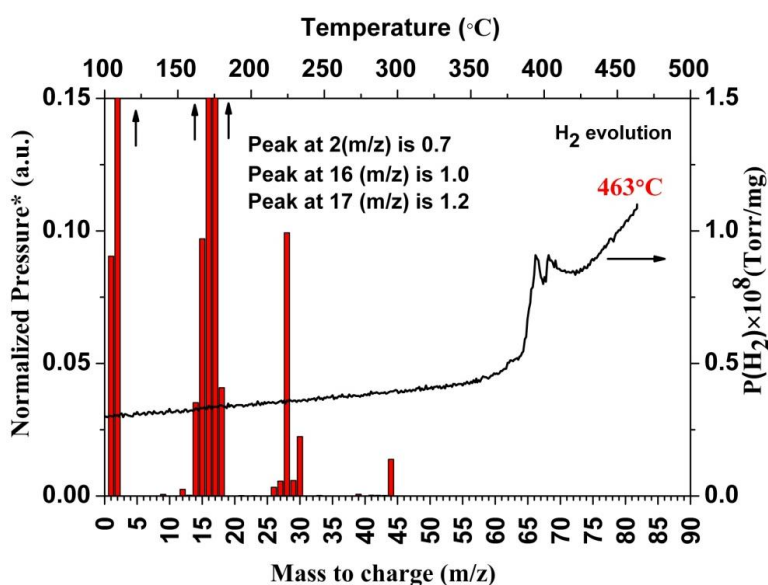

(b)

**Fig. S2.** Direct line-of-sight RGA cracking patterns and gas evolution of  $\text{LiNH}_2$ . (a) shows the evolution of  $\text{NH}_3$  ( $m/z=17$ ) as well as the cracking pattern taken at  $394^\circ\text{C}$ ; (b) shows the evolution of  $\text{H}_2$  ( $m/z=2$ ) as well as the cracking pattern taken at  $463^\circ\text{C}$  which is the near the maximum process temperature. The evolution of hydrogen continues beyond  $475^\circ\text{C}$ , but the peaks shown in the hydrogen curve more than likely are hydrogen release associated with the release of ammonia. Present in the ammonia and hydrogen cracking patterns are  $\text{N}_2\text{H}_2$  ( $m/z = 28$  and  $30$  at similar ratios).

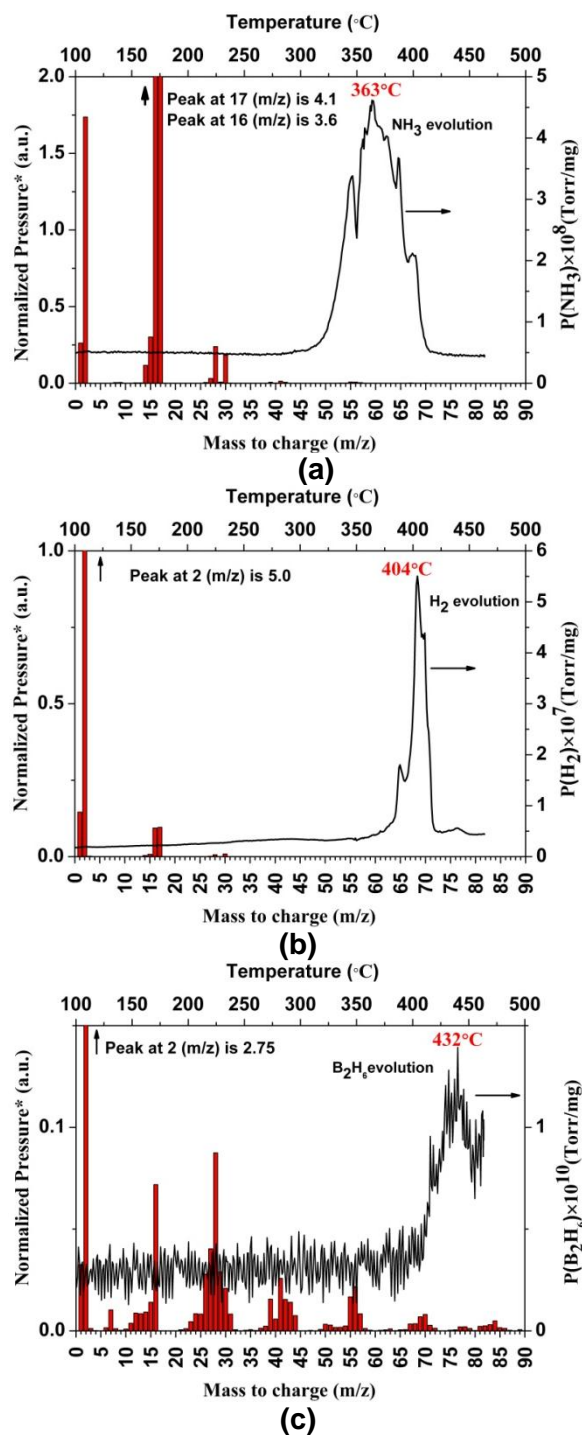

**Fig. S3.** Direct line-of-sight RGA cracking patterns and gas evolution of  $\text{Li}_4\text{BN}_3\text{H}_{10}$ . (a) shows the evolution of  $\text{NH}_3$  ( $m/z=17$ ) as well as the cracking pattern taken at  $363^\circ\text{C}$ ; (b) shows the evolution of  $\text{H}_2$  ( $m/z=2$ ) as well as the cracking pattern taken at  $404^\circ\text{C}$ ; (c) shows the evolution of  $\text{B}_2\text{H}_6$  ( $m/z=24$ ) as well as the cracking pattern taken at  $432^\circ\text{C}$ . The evolution of triborane or larger species (possibly even nitrogen containing boranes such as  $\text{BNH}_2$  or  $\text{BNH}_3$ , for example) is evident from the masses between  $m/z$  of 39-44 and groups centered at 56 and 69.

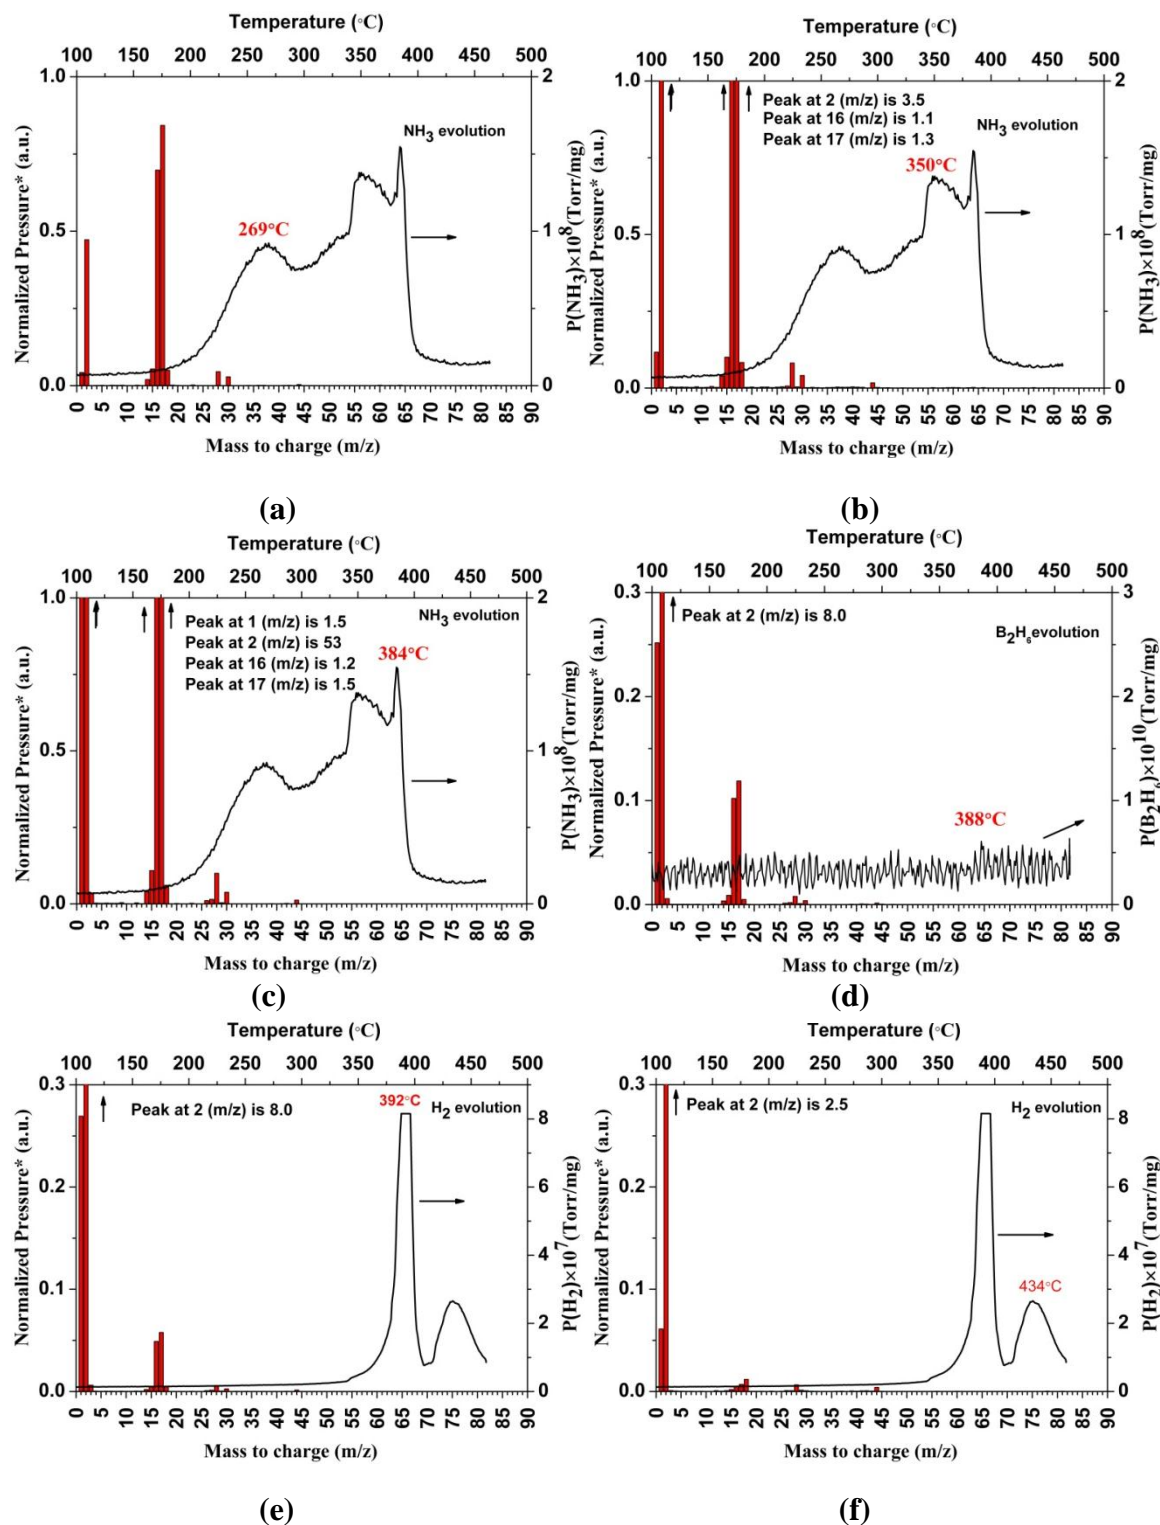

**Fig. S4.** Direct line-of-sight RGA cracking patterns and gas evolution of  $\text{Li}_4\text{BN}_3\text{H}_{10}@NPC$ . (a,b,c) shows the evolution of  $\text{NH}_3$  ( $m/z=17$ ) as well as the cracking pattern taken at the three peaks at 269°C, 350°C, 384°C respectively; (d) shows the evolution of  $\text{B}_2\text{H}_6$  ( $m/z=24$ ) as well as the cracking pattern taken at 388°C. This cracking pattern is absent any strong signal of triborane

or larger species, especially diborane; (e,f) shows the evolution of H<sub>2</sub> (m/z=2) as well as the cracking pattern taken at the peaks of 392°C and 434°C respectively.
